# Supplementary material for: Mlh1 interacts with both Msh2 and Msh6 for recruitment during mismatch repair
Source: PubMed Central journal article supplement — DNA Repair (Amst). Author manuscript; Available in PMC 2022 Nov 7. (PMC9639671; doi:10.1016/j.dnarep.2022.103405), 2022-09-14

**Supplement for**

**Mlh1 interacts with both Msh2 and Msh6 for recruitment during mismatch repair**

By

Matthew DuPrie<sup>1</sup>, Tatiana Palacio<sup>1</sup>, Felipe A. Calil<sup>1</sup>, Richard D. Kolodner<sup>1, 2, 3, 4</sup> and Christopher  
D. Putnam<sup>1, 5</sup>

From

Ludwig Institute for Cancer Research<sup>1</sup>, Department of Cellular and Molecular Medicine<sup>2</sup>,  
Moore's-UCSD Cancer Center<sup>3</sup>, Institute of Genomic Medicine<sup>4</sup> and Department of Medicine<sup>5</sup>,  
University of California School of Medicine, San Diego, 9500 Gilman Drive, La Jolla, CA  
92093-0669

**Supplemental Figure 1. Conservation of Msh2, Msh6, and Msh3 residues predicted to interact with Mlh1.** **A.** Depiction of residues at the MutS connector domain interaction with MutL with residues involved in the interaction highlighted in red (left). The equivalent *S. cerevisiae* residues (right) are shown above a sequence logo generated by WebLogo [66] depicting the conservation of those sites in 744 fungal Msh2 sequences. Below this is a plot of the Cx interface score (see Methods) for the equivalent *E. coli* MutS residues from the MutS-MutL co-crystal structure [21] broken into the averaged atomic score for side chain (black) and main-chain (grey) atoms; larger Cx interface scores correspond to increased burial upon complex formation (see Methods). **B.** Analysis of the residues at the MutS ATPase/core domains interface and the equivalent *S. cerevisiae* Msh6 and Msh3 residues using alignments involving 747 fungal Msh6 sequences and 652 fungal Msh3 sequences. Analysis displayed as in panel A, except that residues at the *E. coli* MutS-MutL interface are shown in blue (left).

**Supplemental Figure 2. Conservation of Mlh1 residues predicted to interact with Msh2, Msh6, and Msh3.** **A.** Analysis of the conservation of Mlh1 residues predicted to be at the Msh2 connector domain interaction depicted as in Supplemental Figure 1A. **B.** Analysis of the conservation of Mlh1 residues predicted to be at the Msh6 and Msh3 ATPase/core domain interaction depicted as in Supplemental Figure 1B.

**Supplemental Table 1. *S. cerevisiae* strains.**

| <b>Strain</b> | <b>Genotype</b>                                              |
|---------------|--------------------------------------------------------------|
| RDKY5964      | MATa <i>ura3-52 leu2Δ1 trp1Δ63 hom3-10 his3Δ200 lys2-10A</i> |
| RDKY9658      | RDKY5964 <i>msh2::HIS3</i>                                   |
| RDKY9670      | RDKY5964 <i>mlh1::HIS3</i>                                   |
| RDKY9792      | RDKY5964 <i>mlh1-K54C</i>                                    |
| RDKY9789      | RDKY5964 <i>mlh1-Q57L,T59L</i>                               |
| RDKY9673      | RDKY5964 <i>pms1::HIS3</i>                                   |

**Supplemental Table 2. Plasmids.**

| <b>Plasmid</b> | <b>Description</b>                   |
|----------------|--------------------------------------|
| pRDK1807       | pRS316/ <i>MLH1</i>                  |
| pRDK1891       | pRS316/ <i>mlh1-K54C</i>             |
| pRDK1892       | pRS316/ <i>mlh1-Q57A,T59A</i>        |
| pRDK1893       | pRS316/ <i>mlh1-Q57L,T59L</i>        |
| pRDK1894       | pRS316/ <i>mlh1-A140E,G141A</i>      |
| pRDK1667       | pRS316/ <i>PMS1</i>                  |
| pRDK1895       | pRS316/ <i>pms1-S138E,R139A</i>      |
| pRDK1896       | pRS316/ <i>pms1-E53C</i>             |
| pRDK1897       | pRS316/ <i>pms1-E56L,S58L</i>        |
| pRDK1898       | pRS316/ <i>pms1-E56A,S58A</i>        |
| pRDK2039       | pRCC-K/ <i>mlh1-Q57,T59</i>          |
| pRDK2043       | pRCC-K/ <i>mlh1-K54</i>              |
| pRDK573        | pRS424/p <i>GAL10-MLH1</i>           |
| pRDK1968       | pRS424/p <i>GAL10-mlh1-Q57L,T59L</i> |
| pRDK1973       | pRS424/p <i>GAL10-mlh1-K54C</i>      |

# Supplemental Figure 1

A

## Msh2 connector domain interface

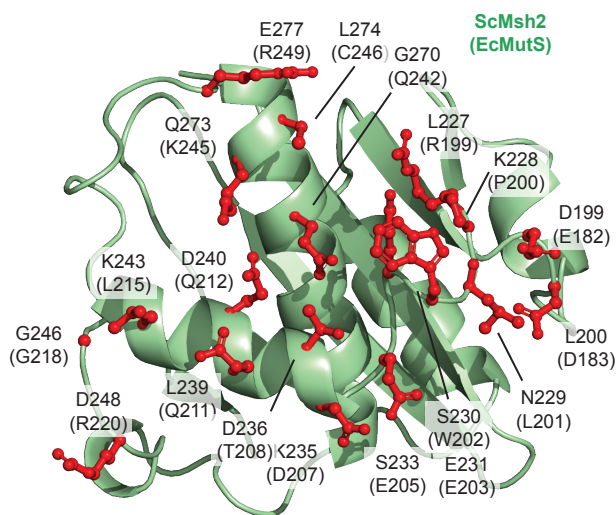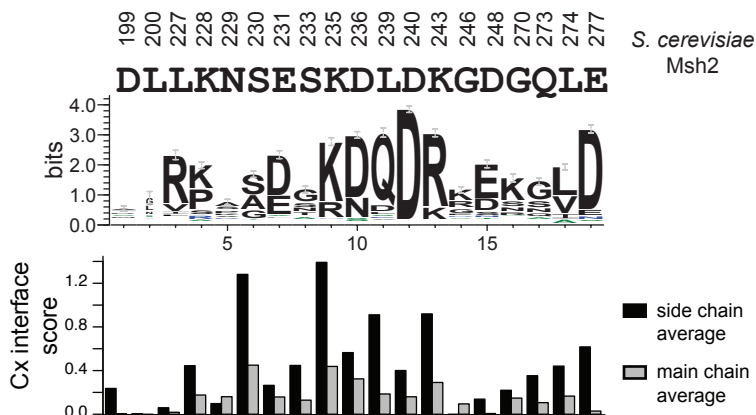

B

## Msh6/Msh3 ATPase domain interface

ScMsh6, ScMsh3 (EcMutS)

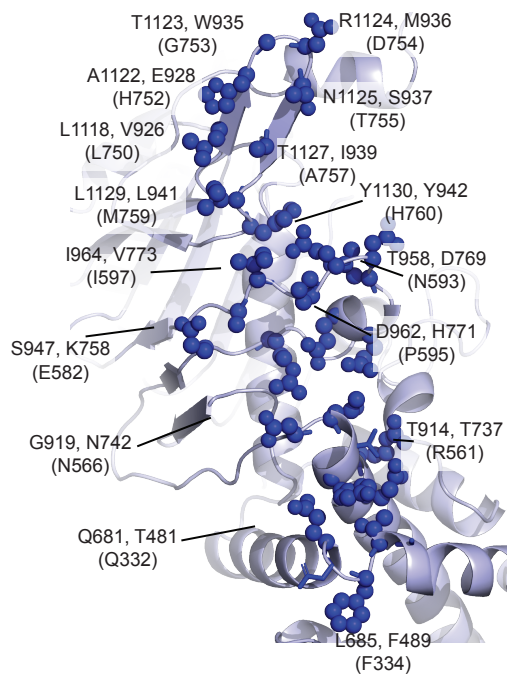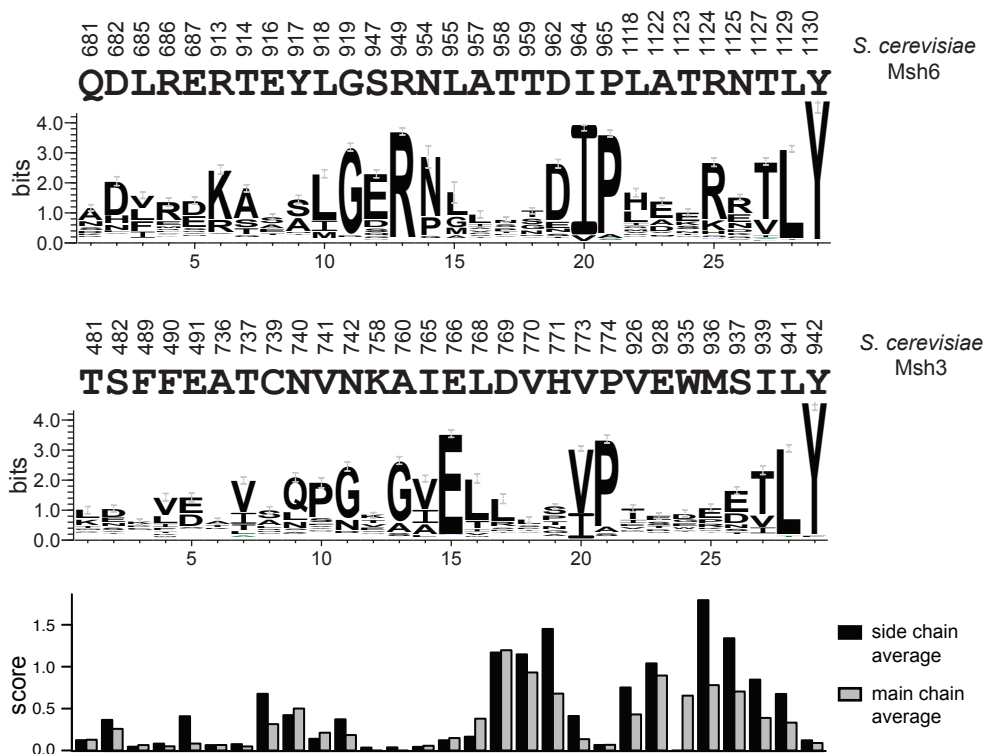

Supplemental Figure 2

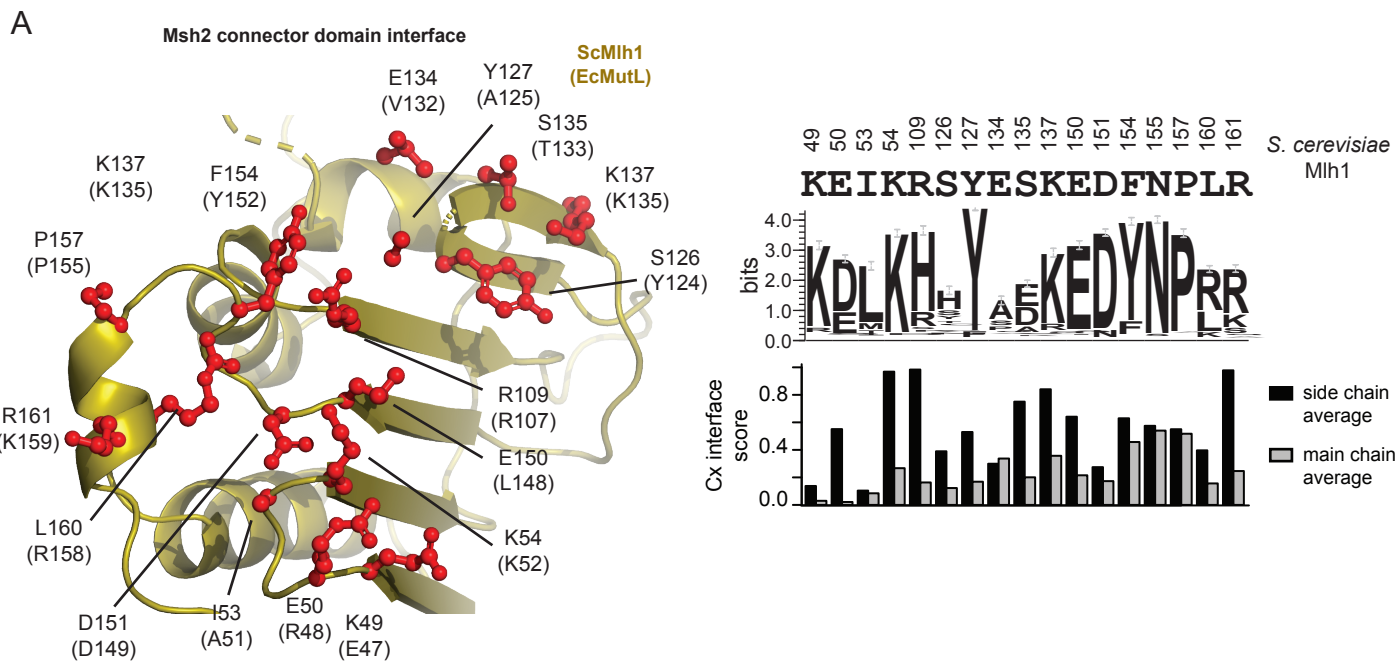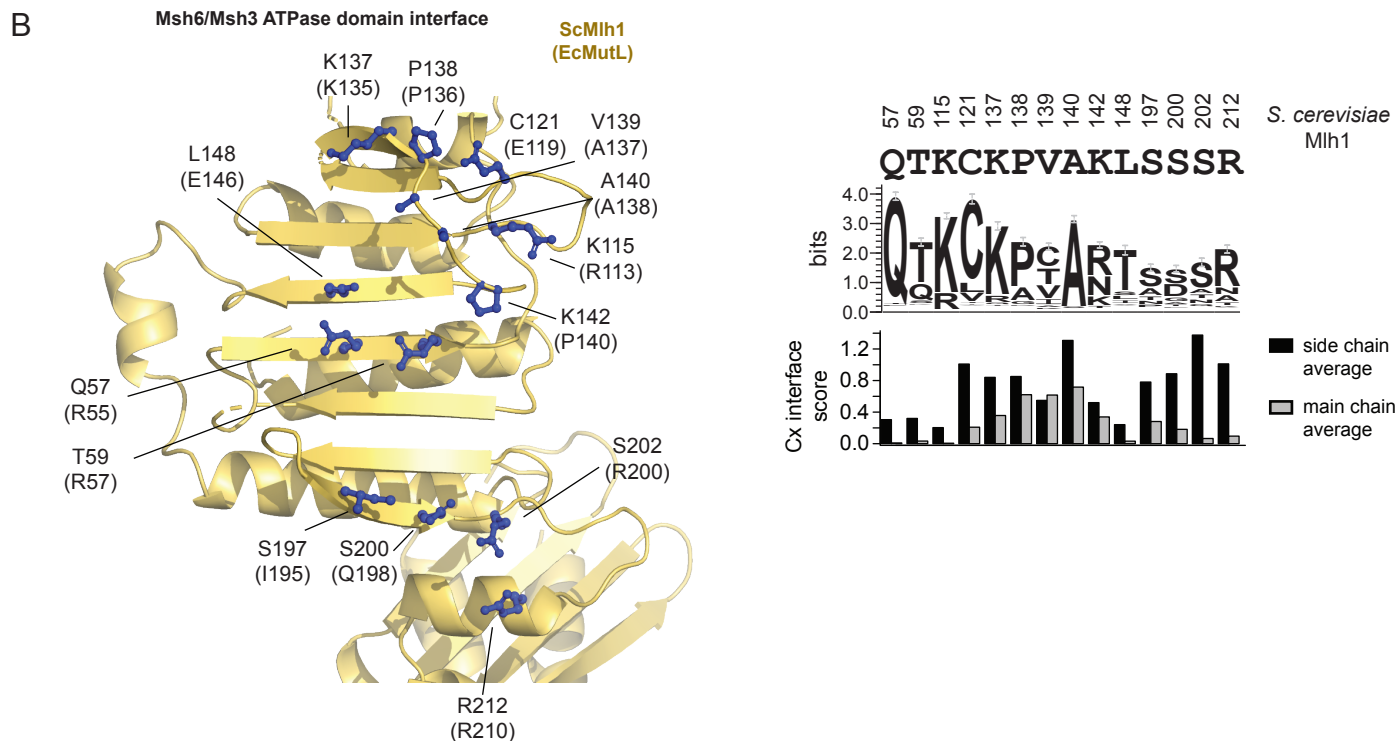

Supplement: NIHMS1843740-supplement-1.pdf [file NIHMS1843740-supplement-1.pdf]
